# Supplementary material for: Energetics of proton configurations in water polyhedra and hydrate frameworks: topology vs. geometry
Source: Royal Society of Chemistry journal article supplement (doi:10.1039/c9cp04107a), 2019-01-01
Supplement: c9cp04107a1.pdf [file c9cp04107a1.pdf]

## Supporting information for

# Energetics of Proton Configurations in Water Polyhedra and Clathrate Frameworks: Topology vs. Geometry

Sergey V. Gudkovskikh<sup>a</sup> and Mikhail V. Kirov<sup>\*,a,b</sup>

<sup>a</sup>*Tyumen Scientific Center, SB RAS, Tyumen, 625026, Russia.*

<sup>b</sup>*Tyumen Industrial University, Tyumen, 625000, Russia.*

*\*e-mail: mkirov@ngs.ru*

**Table S1.** Potential energy U (kcal/mol) of the lowest-energy proton configurations for various polyhedra, total dipole moments (magnitude and direction) (Debyes), and potential energy per molecule U/N (kJ/mol). The data correspond to geometric optimization with the TIP4P potential. Calculations were performed with the Tinker molecular modeling package, version 6.2.

| Polyhedron                                         | U         | Dx     | Dy     | Dz     | D     | N  | U/N      |
|----------------------------------------------------|-----------|--------|--------|--------|-------|----|----------|
| D (5 <sup>12</sup> )                               | -197.4744 | 0.598  | -0.934 | 0.764  | 1.347 | 20 | -41.3116 |
| T (5 <sup>12</sup> 6 <sup>2</sup> )                | -238.0425 | -0.01  | 0.006  | 0.809  | 0.809 | 24 | -41.4987 |
| K (4 <sup>6</sup> 6 <sup>8</sup> )                 | -238.4780 | 0      | 0      | 0      | 0     | 24 | -41.5747 |
| 2 (4 <sup>15</sup> 10 <sup>6</sup> 3)              | -237.3113 | -1.057 | -1.596 | -1.927 | 2.716 | 24 | -41.3713 |
| 3 (4 <sup>2</sup> 5 <sup>8</sup> 6 <sup>4</sup> )  | -237.1987 | 0      | 0      | 0      | 0     | 24 | -41.3516 |
| 4 (4 <sup>2</sup> 5 <sup>8</sup> 6 <sup>4</sup> )  | -236.9954 | 0.175  | -0.081 | 0.968  | 0.987 | 24 | -41.3162 |
| 5 (4 <sup>2</sup> 5 <sup>8</sup> 6 <sup>4</sup> )  | -237.7371 | 1.234  | 1.4    | -0.029 | 1.866 | 24 | -41.4455 |
| 6 (4 <sup>2</sup> 5 <sup>8</sup> 6 <sup>4</sup> )  | -237.1950 | -1.462 | 1.528  | 0.471  | 2.167 | 24 | -41.3510 |
| 12 (4 <sup>2</sup> 5 <sup>8</sup> 6 <sup>4</sup> ) | -237.1119 | 2.393  | -1.486 | 0.026  | 2.817 | 24 | -41.3365 |
| 22 (4 <sup>3</sup> 5 <sup>6</sup> 6 <sup>5</sup> ) | -237.2418 | 0      | -0.001 | 0.133  | 0.133 | 24 | -41.3592 |
| 31 (4 <sup>4</sup> 5 <sup>4</sup> 6 <sup>6</sup> ) | -237.8472 | 1.469  | 1.996  | 0.041  | 2.479 | 24 | -41.4647 |

**Table S2.** Coordinates for lowest energy configuration of the pentagonal dodecahedron (H<sub>2</sub>O)<sub>20</sub>, (D-cage) calculated with the TIP4P potential

| Atom | X(Å)        | Y(Å)        | Z(Å)        |
|------|-------------|-------------|-------------|
| O    | 2.30067113  | -0.13104076 | 2.82584946  |
| H    | 1.76214871  | 0.64889392  | 2.95974246  |
| H    | 1.6874594   | -0.86206297 | 2.90207113  |
| O    | 0.69441656  | 2.0573317   | 3.02269116  |
| H    | -0.24739382 | 1.89012746  | 3.05829725  |
| H    | 0.8089749   | 2.62336633  | 2.25933474  |
| O    | -2.00124588 | 1.51721923  | 3.18955217  |
| H    | -1.9707806  | 0.56220662  | 3.13250281  |
| H    | -2.2378076  | 1.69584056  | 4.09969766  |
| O    | -1.90703361 | -1.15721308 | 3.02307599  |
| H    | -1.04052038 | -1.56360388 | 3.00780579  |
| H    | -2.35866953 | -1.52642442 | 2.264169    |
| O    | 0.60352815  | -2.29742711 | 2.99110544  |
| H    | 0.80710706  | -2.81319618 | 2.21086847  |
| H    | 0.83545457  | -2.86843214 | 3.72349553  |
| O    | 3.81526541  | 0.01554396  | 0.6190502   |
| H    | 4.71330796  | 0.05629954  | 0.94782124  |
| H    | 3.27296493  | -0.02557131 | 1.40673767  |
| O    | 1.04587131  | 3.61638532  | 0.7888606   |
| H    | 1.43495232  | 4.48287644  | 0.90735514  |
| H    | 1.69459314  | 3.12948337  | 0.28061035  |
| O    | -3.07237117 | 2.23014239  | 0.77783765  |
| H    | -2.69599653 | 1.99270653  | 1.62530339  |
| H    | -3.80423098 | 2.8080737   | 0.9937276   |
| O    | -3.15484834 | -2.15000921 | 0.78950913  |
| H    | -2.46331252 | -2.62107138 | 0.32463228  |
| H    | -3.87683795 | -2.77609768 | 0.84406266  |
| O    | 1.2221915   | -3.75084751 | 0.75586974  |
| H    | 1.81632141  | -3.19807317 | 0.24824584  |
| H    | 1.5301918   | -4.64314739 | 0.59722369  |
| O    | 2.87421943  | 2.26122846  | -0.64860863 |
| H    | 3.22106005  | 1.47756688  | -0.22221919 |
| H    | 2.60438454  | 1.96243104  | -1.51702159 |
| O    | -1.16955886 | 3.42500631  | -0.82394011 |
| H    | -0.40856268 | 3.51735467  | -0.25071377 |
| H    | -1.83433717 | 3.00895843  | -0.27511792 |
| O    | -3.59253824 | 0.03924277  | -0.81346671 |
| H    | -3.42125077 | 0.79637894  | -0.25343344 |
| H    | -3.45677587 | -0.71706665 | -0.24268086 |
| O    | -1.21590255 | -3.48084868 | -0.49840472 |
| H    | -0.36156836 | -3.57556057 | -0.0772461  |
| H    | -1.02100977 | -3.09491859 | -1.35239922 |
| O    | 2.89875247  | -2.22026454 | -0.6817806  |
| H    | 3.25392062  | -1.44525262 | -0.24652901 |
| H    | 2.58530287  | -1.89835445 | -1.52697589 |
| O    | 2.0752944   | 1.46211092  | -3.15898902 |
| H    | 1.14627332  | 1.69175384  | -3.13859804 |
| H    | 2.45925339  | 2.07111342  | -3.78980064 |
| O    | -0.51782401 | 2.1025042   | -3.11305011 |
| H    | -0.77944777 | 2.61767413  | -2.34990872 |
| H    | -1.14563405 | 1.38052531  | -3.14190973 |
| O    | -2.25483855 | -0.02715804 | -3.14775891 |
| H    | -2.72561201 | 0.00372051  | -2.31490196 |
| H    | -2.94360301 | -0.04637138 | -3.81218814 |
| O    | -0.6214715  | -2.21703763 | -2.83135742 |
| H    | -1.1881828  | -1.4587706  | -2.97313631 |
| H    | 0.26714275  | -1.87237158 | -2.9196856  |
| O    | 1.95940925  | -1.26674271 | -3.08907081 |
| H    | 2.00583274  | -0.31094446 | -3.11201425 |
| H    | 2.36071066  | -1.54632448 | -3.91188491 |

**Table S3.** Coordinates for lowest energy configuration of the T-cage (H<sub>2</sub>O)<sub>24</sub> cluster calculated with the TIP4P potential

| Atom | X(Å)        | Y(Å)        | Z(Å)        |
|------|-------------|-------------|-------------|
| O    | -2.81747714 | 0.17698371  | 2.87837948  |
| H    | -2.31387461 | -0.6360862  | 2.8392175   |
| H    | -3.35028183 | 0.09142275  | 3.66896807  |
| O    | -4.30234235 | -0.00189396 | 0.57453218  |
| H    | -3.78864972 | 0.07535666  | 1.37851232  |
| H    | -4.12258965 | 0.80749337  | 0.0961882   |
| O    | -3.71092135 | -2.30377398 | -0.75058959 |
| H    | -3.9848243  | -1.50201673 | -0.30517482 |
| H    | -3.25704998 | -1.99877989 | -1.5362175  |
| O    | -2.3323937  | -3.93605243 | 0.85173336  |
| H    | -2.99344799 | -4.51579814 | 1.23006387  |
| H    | -2.82656931 | -3.35118694 | 0.27731655  |
| O    | -1.51006973 | -2.17843612 | 2.80784787  |
| H    | -1.7680322  | -2.79233903 | 2.12023576  |
| H    | -0.55704684 | -2.25543186 | 2.85313436  |
| O    | -3.75154159 | 2.33090634  | -0.78598047 |
| H    | -4.50653948 | 2.85857054  | -1.0463274  |
| H    | -3.23687243 | 2.9095501   | -0.22338035 |
| O    | -2.2637698  | 3.98781939  | 0.79405977  |
| H    | -1.49585635 | 4.12335801  | 0.2389291   |
| H    | -2.44494505 | 4.85021322  | 1.16780334  |
| O    | -1.20264248 | 2.39721135  | 2.77793834  |
| H    | -1.74673887 | 1.61032317  | 2.80952881  |
| H    | -1.58778697 | 2.92744115  | 2.08026225  |
| O    | -2.3611554  | -1.46393717 | -2.99220294 |
| H    | -2.83780777 | -1.60686949 | -3.80988546 |
| H    | -2.29385685 | -0.51208118 | -2.91688427 |
| O    | -2.27702401 | 1.22439748  | -2.83809971 |
| H    | -2.77472357 | 1.61926666  | -2.12213511 |
| H    | -1.47672584 | 1.74687192  | -2.89077935 |
| O    | -0.13397983 | -4.43065097 | -0.69024447 |
| H    | -0.89941793 | -4.26193387 | -0.14081669 |
| H    | -0.21037438 | -5.35385069 | -0.93127973 |
| O    | 0.11323965  | -2.64607601 | -2.77924831 |
| H    | -0.73855396 | -2.21553574 | -2.85214939 |
| H    | 0.0109776   | -3.25860926 | -2.05084092 |
| O    | -0.01153466 | 2.77640896  | -2.99381334 |
| H    | 0.77702533  | 2.24227627  | -2.8983815  |
| H    | 0.12368764  | 3.26057814  | -3.80838499 |
| O    | -0.12097687 | 4.36552973  | -0.75445249 |
| H    | -0.06381122 | 3.81987586  | -1.53881578 |
| H    | 0.69877002  | 4.20200115  | -0.28807788 |
| O    | 2.14454849  | -3.71134099 | 0.68352449  |
| H    | 1.35974383  | -3.97087816 | 0.20087147  |
| H    | 1.81080816  | -3.28747897 | 1.4742142   |
| O    | 1.21857623  | -2.46437891 | 2.94895845  |
| H    | 1.67155664  | -1.62275353 | 2.89692658  |
| H    | 1.54901298  | -2.86547374 | 3.75280317  |
| O    | 2.48552022  | -1.37837762 | -2.93149912 |
| H    | 1.62656223  | -1.79429925 | -2.85779565 |
| H    | 2.85780478  | -1.73762245 | -3.73684327 |
| O    | 2.27003442  | 1.35959814  | -2.78155294 |
| H    | 2.32377083  | 0.40528067  | -2.83276239 |
| H    | 2.84248282  | 1.59333488  | -2.05086709 |
| O    | 3.85924057  | -2.07773776 | -0.6564576  |
| H    | 3.2961464   | -2.7058809  | -0.20413803 |
| H    | 3.37814846  | -1.85456728 | -1.45331214 |
| O    | 3.91290459  | 2.08374309  | -0.68719224 |
| H    | 4.14240364  | 1.3488011   | -0.11848994 |
| H    | 4.75367626  | 2.47379787  | -0.92634095 |
| O    | 2.13393977  | 3.72717845  | 0.62838364  |
| H    | 2.75700179  | 3.16680348  | 0.16577641  |
| H    | 1.92369521  | 3.24377391  | 1.42735117  |
| O    | 1.48826696  | 2.3520587   | 2.9167638   |
| H    | 1.66040453  | 2.85637926  | 3.71191239  |
| H    | 0.53363039  | 2.32234987  | 2.85337418  |
| O    | 4.5638237   | -0.03289194 | 0.91015458  |
| H    | 4.31148152  | -0.76579331 | 0.34854008  |
| H    | 5.39153854  | -0.30705927 | 1.30506249  |
| O    | 2.60602005  | -0.1564591  | 2.8449793   |
| H    | 2.19586508  | 0.70815669  | 2.86605739  |
| H    | 3.27527931  | -0.08806264 | 2.16406388  |

**Table S4.** Coordinates for lowest energy configuration of the Kelvin polyhedron (H<sub>2</sub>O)<sub>24</sub>, 4<sup>6</sup>6<sup>8</sup> calculated with the TIP4P potential

| Atom | X(Å)        | Y(Å)        | Z(Å)        |
|------|-------------|-------------|-------------|
| O    | 1.84873224  | 3.74511918  | 0.0047781   |
| H    | 1.26496892  | 3.79854776  | 0.7614799   |
| H    | 1.26571816  | 3.79968332  | -0.75242014 |
| O    | 3.93562769  | 2.0396277   | 0.00288185  |
| H    | 3.17013829  | 2.61430788  | 0.00360052  |
| H    | 4.68387504  | 2.63658423  | 0.00368266  |
| O    | 3.75083609  | -0.01429738 | 1.83714229  |
| H    | 3.80537814  | 0.74314764  | 1.25444679  |
| H    | 3.80056095  | -0.77074437 | 1.25272186  |
| O    | 2.05192285  | -0.01031183 | 3.92938327  |
| H    | 2.62420553  | -0.01164608 | 3.16210067  |
| H    | 2.65121237  | -0.01267494 | 4.67576006  |
| O    | 0.00530022  | 1.83296491  | 3.75284813  |
| H    | 0.76043289  | 1.24700274  | 3.80437305  |
| H    | -0.75346047 | 1.25170098  | 3.80429038  |
| O    | 0.01180696  | 3.9273422   | 2.05656753  |
| H    | 0.00940921  | 3.15935104  | 2.62789552  |
| H    | 0.01396724  | 4.67296905  | 2.65679063  |
| O    | 0.01334599  | 3.93114634  | -2.0480806  |
| H    | 0.01596805  | 4.67807791  | -2.64667746 |
| H    | 0.0108198   | 3.16440242  | -2.62108078 |
| O    | 0.00643842  | 1.84051697  | -3.74893257 |
| H    | 0.76146695  | 1.25451986  | -3.80157442 |
| H    | -0.7524255  | 1.25950269  | -3.8016563  |
| O    | 2.0527522   | -0.00266696 | -3.92894964 |
| H    | 2.65221844  | -0.00337872 | -4.67518791 |
| H    | 2.62485446  | -0.00527771 | -3.16153577 |
| O    | 3.75117518  | -0.00998466 | -1.83631371 |
| H    | 3.80556087  | 0.74612094  | -1.25186666 |
| H    | 3.80083574  | -0.76777132 | -1.25362593 |
| O    | 3.92264456  | -2.06503424 | -0.00201447 |
| H    | 4.66700813  | -2.66682679 | -0.00267336 |
| H    | 3.15344752  | -2.6347421  | -0.00285748 |
| O    | 1.82470363  | -3.75689643 | -0.00432569 |
| H    | 1.24116783  | -3.80779573 | 0.75272587  |
| H    | 1.24077729  | -3.80631802 | -0.76117401 |
| O    | -0.01224901 | -3.93109453 | 2.04816778  |
| H    | -0.01460309 | -4.67803058 | 2.64676015  |
| H    | -0.00994737 | -3.16435334 | 2.62117258  |
| O    | -0.00606888 | -1.84048278 | 3.7490846   |
| H    | 0.75268157  | -1.25933076 | 3.80192327  |
| H    | -0.76121175 | -1.25462506 | 3.80163767  |
| O    | -2.0527325  | 0.00240056  | 3.92890005  |
| H    | -2.65216803 | 0.0031904   | 4.67516291  |
| H    | -2.62486573 | 0.00513909  | 3.16150973  |
| O    | -3.75123666 | 0.01020733  | 1.83633644  |
| H    | -3.80077106 | 0.76786815  | 1.25347431  |
| H    | -3.80571922 | -0.74602376 | 1.2520608   |
| O    | -3.92248957 | 2.06481354  | 0.00147922  |
| H    | -4.66690229 | 2.66654543  | 0.001999    |
| H    | -3.15333906 | 2.63458447  | 0.00212119  |
| O    | -0.00566185 | -1.83289033 | -3.75323293 |
| H    | 0.75321252  | -1.25176497 | -3.80456376 |
| H    | -0.76067992 | -1.2467852  | -3.80481128 |
| O    | -0.01289158 | -3.92696256 | -2.05656331 |
| H    | -0.01027125 | -3.15906043 | -2.62800997 |
| H    | -0.01530814 | -4.67268137 | -2.65667118 |
| O    | -1.84870186 | -3.74508457 | -0.00374844 |
| H    | -1.26520227 | -3.79976327 | 0.75306747  |
| H    | -1.26540899 | -3.79823662 | -0.7608324  |
| O    | -3.93578742 | -2.03984677 | -0.00230444 |
| H    | -3.17024642 | -2.61445847 | -0.0027546  |
| H    | -4.68398115 | -2.63687063 | -0.00300941 |
| O    | -3.75081122 | 0.01360073  | -1.83712621 |
| H    | -3.8004983  | 0.77016071  | -1.25284886 |
| H    | -3.8053999  | -0.74373132 | -1.25428826 |
| O    | -2.05193388 | 0.01084085  | -3.92940186 |
| H    | -2.62421268 | 0.01154434  | -3.16211553 |
| H    | -2.65122488 | 0.01448524  | -4.67577232 |
| O    | -1.82472389 | 3.75691769  | 0.00341985  |
| H    | -1.24125305 | 3.80645093  | 0.76061208  |
| H    | -1.24074769 | 3.80787986  | -0.75328781 |

**Table S5.** Coordinates for lowest energy configuration of the (H<sub>2</sub>O)<sub>24</sub> cluster No. 2 calculated with the TIP4P potential

| Atom | X(Å)        | Y(Å)        | Z(Å)        |
|------|-------------|-------------|-------------|
| O    | -2.99192713 | 2.51213783  | -0.09927955 |
| H    | -2.92883318 | 2.09876351  | 0.76175045  |
| H    | -2.44540708 | 3.29494638  | -0.03029812 |
| O    | -2.89372908 | 1.39672605  | 2.42309883  |
| H    | -3.67123766 | 1.66727729  | 2.91147806  |
| H    | -2.92392095 | 0.44007187  | 2.4346345   |
| O    | -2.97808253 | 1.45153838  | -2.56192737 |
| H    | -2.97042783 | 1.78537952  | -1.66486364 |
| H    | -3.61384983 | 2.00306866  | -3.01782881 |
| O    | -1.30990204 | 4.64494266  | 0.03701031  |
| H    | -0.72368685 | 4.60197301  | -0.7184612  |
| H    | -0.72827472 | 4.59216512  | 0.79540074  |
| O    | -0.53578178 | 2.31423138  | 3.50241726  |
| H    | -1.35078919 | 1.98392968  | 3.12440199  |
| H    | -0.02236401 | 1.52840713  | 3.68980532  |
| O    | -3.00783328 | -1.33247909 | 2.519103    |
| H    | -3.66569709 | -1.89198051 | 2.93190465  |
| H    | -2.93664509 | -1.66560092 | 1.62456741  |
| O    | -0.52815486 | 2.32727075  | -3.46291121 |
| H    | -1.36452331 | 1.98750998  | -3.14466243 |
| H    | -0.00023448 | 1.54664779  | -3.63071975 |
| O    | -2.85844195 | -1.27608249 | -2.4680943  |
| H    | -3.67041586 | -1.54510537 | -2.89769514 |
| H    | -2.88840704 | -0.31938298 | -2.47583971 |
| O    | 0.50149276  | 4.35524464  | -2.0209257  |
| H    | 0.15627066  | 3.62057776  | -2.52819103 |
| H    | 0.67996474  | 5.03370174  | -2.67213653 |
| O    | 0.51552987  | 4.34111216  | 2.08167747  |
| H    | 0.693951    | 5.01591431  | 2.73668877  |
| H    | 0.16667963  | 3.6050024   | 2.5843481   |
| O    | 0.91768541  | 0.05359643  | 4.0485218   |
| H    | 1.61146691  | -0.0236215  | 3.39358939  |
| H    | 1.37902899  | 0.06036637  | 4.88718031  |
| O    | -0.60030942 | -2.17640186 | 3.55553256  |
| H    | -1.42360104 | -1.84700276 | 3.19508982  |
| H    | -0.0874178  | -1.38962774 | 3.7403582   |
| O    | -2.83599416 | -2.38788112 | 0.05806638  |
| H    | -2.81480697 | -1.97011196 | -0.80289348 |
| H    | -2.19511791 | -3.09623963 | -0.00307029 |
| O    | 0.99116315  | 0.10281706  | -3.98638296 |
| H    | 1.47667884  | 0.17452433  | -4.80818855 |
| H    | 1.66644263  | -0.01384905 | -3.31808776 |
| O    | -0.50545212 | -2.16086871 | -3.58485773 |
| H    | -1.32538869 | -1.85260288 | -3.19897168 |
| H    | -0.0033566  | -1.36297663 | -3.75068942 |
| O    | 2.18260461  | 3.55095902  | 0.02201901  |
| H    | 1.65514807  | 3.81731418  | -0.73102572 |
| H    | 1.66221347  | 3.80899587  | 0.7828356   |
| O    | 2.91974717  | -0.24626802 | 2.28511905  |
| H    | 3.08522526  | 0.26926041  | 1.49576533  |
| H    | 3.01720307  | -1.15563566 | 2.00265721  |
| O    | 0.69033686  | -4.06456809 | 2.13947881  |
| H    | 0.23451573  | -3.38520916 | 2.63639971  |
| H    | 0.76997021  | -4.79660583 | 2.75104329  |
| O    | -0.91176479 | -4.30762839 | -0.07717781 |
| H    | -0.34621792 | -4.25278515 | 0.69313433  |
| H    | -0.31237272 | -4.2391365  | -0.82032641 |
| O    | 2.94048654  | -0.34052408 | -2.18628077 |
| H    | 3.11438984  | 0.2086529   | -1.42182402 |
| H    | 2.99356408  | -1.23695048 | -1.85486814 |
| O    | 0.75191234  | -4.12930686 | -2.2650307  |
| H    | 0.56389362  | -4.91480003 | -2.77872446 |
| H    | 0.31058577  | -3.42283672 | -2.73658413 |
| O    | 3.50667722  | 1.20144062  | 0.01829715  |
| H    | 2.99859824  | 2.01266415  | 0.01630372  |
| H    | 4.4171346   | 1.48866921  | 0.08757145  |
| O    | 3.03102152  | -2.82174376 | 1.41493549  |
| H    | 2.22685677  | -3.27425733 | 1.6694593   |
| H    | 3.03647021  | -2.86169794 | 0.45858523  |
| O    | 3.04054498  | -2.96019615 | -1.33437705 |
| H    | 2.2415361   | -3.38259802 | -1.64964409 |
| H    | 3.75010017  | -3.50793331 | -1.67015567 |

**Table S6.** Coordinates for lowest energy configuration of the (H<sub>2</sub>O)<sub>24</sub> cluster No. 3 calculated with the TIP4P potential

| Atom | X(Å)        | Y(Å)        | Z(Å)        |
|------|-------------|-------------|-------------|
| O    | 1.22880172  | -4.27757338 | 1.35762305  |
| H    | 1.41167029  | -4.36496799 | 0.42212687  |
| H    | 0.28189715  | -4.39783927 | 1.4293147   |
| O    | 1.49606217  | -4.50197685 | -1.37747946 |
| H    | 1.79355823  | -3.69287768 | -1.79351607 |
| H    | 1.91330937  | -5.19936563 | -1.88323188 |
| O    | 2.27582749  | -2.26393694 | -2.63248071 |
| H    | 2.60551561  | -1.46818982 | -2.21495932 |
| H    | 1.55878094  | -1.96275615 | -3.19048269 |
| O    | 3.29398844  | 0.0062578   | -1.45535449 |
| H    | 3.1328225   | -0.01302359 | -0.51201701 |
| H    | 4.24761657  | -0.01034617 | -1.53628368 |
| O    | 2.99133131  | -0.05850491 | 1.23225428  |
| H    | 2.67026012  | -0.81073632 | 1.72953995  |
| H    | 2.69890569  | 0.70288875  | 1.73325207  |
| O    | 2.22506194  | -2.2230367  | 2.77519928  |
| H    | 1.87019309  | -2.93261457 | 2.23966293  |
| H    | 3.05557913  | -2.56468325 | 3.10648567  |
| O    | -1.52292751 | -4.47635938 | 1.39869835  |
| H    | -2.0769341  | -5.14131136 | 1.80753501  |
| H    | -1.78057095 | -3.65676092 | 1.82072923  |
| O    | -1.24323205 | -4.18536965 | -1.32856583 |
| H    | -0.29932449 | -4.32159915 | -1.41049197 |
| H    | -1.41984391 | -4.28539178 | -0.39313243 |
| O    | -2.18151959 | -2.09768182 | -2.74529379 |
| H    | -2.81086855 | -2.51275747 | -3.3350937  |
| H    | -1.84950501 | -2.81492284 | -2.20532761 |
| O    | 0.12738739  | -1.3841929  | -4.05099112 |
| H    | -0.67906467 | -1.63290667 | -3.59931827 |
| H    | 0.09641741  | -0.42822862 | -4.0884742  |
| O    | -2.99133722 | 0.05851558  | -1.23226065 |
| H    | -2.69891185 | -0.70288122 | -1.73325382 |
| H    | -2.67026451 | 0.81074383  | -1.72955011 |
| O    | -2.2250617  | 2.22304049  | -2.77521321 |
| H    | -3.05557696 | 2.56469154  | -3.10649981 |
| H    | -1.8701919  | 2.93261428  | -2.23967208 |
| O    | -0.00932139 | 1.36000605  | -4.12220049 |
| H    | -0.09797805 | 1.74484354  | -4.99413624 |
| H    | -0.791562   | 1.64839984  | -3.65192347 |
| O    | 2.17374552  | 2.20182706  | -2.66941294 |
| H    | 2.54704605  | 1.4324543   | -2.23936165 |
| H    | 1.44398663  | 1.8582369   | -3.1848056  |
| O    | -1.22879973 | 4.27756549  | -1.35762134 |
| H    | -0.28189511 | 4.39783161  | -1.42931196 |
| H    | -1.41166942 | 4.36496071  | -0.42212543 |
| O    | 1.52292892  | 4.47635565  | -1.3986949  |
| H    | 1.78057369  | 3.6567602   | -1.82073082 |
| H    | 2.07692931  | 5.1413121   | -1.80753266 |
| O    | -1.49606255 | 4.50197414  | 1.37748089  |
| H    | -1.91331063 | 5.19936407  | 1.88323101  |
| H    | -1.79355723 | 3.69287599  | 1.79352046  |
| O    | 1.24323172  | 4.18536973  | 1.32856999  |
| H    | 1.41984481  | 4.28538962  | 0.39313657  |
| H    | 0.29932397  | 4.32159887  | 1.41049449  |
| O    | -2.27582551 | 2.26393722  | 2.63248877  |
| H    | -2.60551214 | 1.46819187  | 2.21496285  |
| H    | -1.55878148 | 1.96275398  | 3.19049267  |
| O    | -3.29398572 | -0.00625072 | 1.45534919  |
| H    | -4.24761358 | 0.01035447  | 1.53628133  |
| H    | -3.13282262 | 0.01303332  | 0.51201127  |
| O    | 0.00932505  | -1.36001329 | 4.12219881  |
| H    | 0.79156468  | -1.64839936 | 3.65191541  |
| H    | 0.09797091  | -1.74488624 | 4.99412     |
| O    | -0.1273907  | 1.38418726  | 4.05100422  |
| H    | -0.09641787 | 0.42822313  | 4.08848887  |
| H    | 0.67906003  | 1.63290263  | 3.59932987  |
| O    | 2.18151226  | 2.09768156  | 2.74530193  |
| H    | 2.81086134  | 2.51275609  | 3.33510249  |
| H    | 1.84949949  | 2.81492317  | 2.20533542  |
| O    | -2.17373995 | -2.20182164 | 2.66940191  |
| H    | -2.54704118 | -1.43244851 | 2.2393519   |
| H    | -1.44398142 | -1.85823167 | 3.18479521  |

**Table S7.** Coordinates for lowest energy configuration of the (H<sub>2</sub>O)<sub>24</sub> cluster No. 4 calculated with the TIP4P potential

| Atom | X(Å)        | Y(Å)        | Z(Å)       |
|------|-------------|-------------|------------|
| O    | 1.20238644  | -3.44726581 | -2.2713668 |
| H    | 1.48876638  | -4.21298752 | -2.7692509 |
| H    | 1.10712294  | -3.76639411 | -1.373974  |
| O    | 0.87509286  | -4.4574663  | 0.2042385  |
| H    | 1.338712    | -4.09577828 | 0.9595337  |
| H    | -0.03863208 | -4.50763625 | 0.4849903  |
| O    | 1.9413271   | -3.42159615 | 2.5230992  |
| H    | 1.05806725  | -3.3730413  | 2.8887853  |
| H    | 2.39880572  | -4.04871438 | 3.0831598  |
| O    | 2.67066578  | -0.81495135 | 2.0294862  |
| H    | 2.44521099  | -1.73252025 | 2.1826831  |
| H    | 2.09055766  | -0.32478717 | 2.6121057  |
| O    | 3.52001049  | 0.00336344  | -0.4039907 |
| H    | 3.16564875  | -0.28336752 | 0.437701   |
| H    | 4.46911168  | -0.06617432 | -0.3010186 |
| O    | 2.60138069  | -1.12580103 | -2.7392611 |
| H    | 2.14257962  | -1.9340861  | -2.5103317 |
| H    | 2.89021417  | -0.7677979  | -1.8998322 |
| O    | -1.38919905 | -2.72687994 | -2.8504822 |
| H    | -0.48181888 | -2.96431431 | -2.6593854 |
| H    | -1.32618304 | -1.8920887  | -3.3145775 |
| O    | -2.8763713  | -2.74880288 | -0.5702929 |
| H    | -2.40429269 | -2.75447002 | -1.4029642 |
| H    | -3.09505577 | -1.82836799 | -0.4246613 |
| O    | -1.71771305 | -4.44722544 | 1.151816   |
| H    | -2.13764756 | -3.81527689 | 0.5682683  |
| H    | -2.28676939 | -5.21633042 | 1.1220795  |
| O    | -0.592423   | -3.32412736 | 3.3991702  |
| H    | -1.08020936 | -3.70518429 | 2.6690387  |
| H    | -0.92468165 | -2.42913821 | 3.4686716  |
| O    | -1.36342492 | -0.71502227 | 3.7253678  |
| H    | -1.71547091 | -0.60909216 | 4.6091519  |
| H    | -0.50525792 | -0.29216818 | 3.7566034  |
| O    | 1.0815924   | 0.49499331  | 3.8729278  |
| H    | 1.66447913  | 0.56670392  | 4.6287932  |
| H    | 0.91805349  | 1.40050223  | 3.6092225  |
| O    | 0.58629485  | 3.05402982  | 3.2298397  |
| H    | 1.09323882  | 3.48543527  | 2.541996   |
| H    | -0.32614353 | 3.23866539  | 3.0071342  |
| O    | 1.8255984   | 4.31809106  | 1.1170662  |
| H    | 2.42065204  | 5.06746651  | 1.1411376  |
| H    | 2.23210789  | 3.70853912  | 0.5010886  |
| O    | 2.95142907  | 2.68335662  | -0.6898883 |
| H    | 3.11381142  | 1.74528086  | -0.5905018 |
| H    | 2.48690646  | 2.75952446  | -1.5233444 |
| O    | 1.48149157  | 2.85598403  | -2.9764316 |
| H    | 1.40929004  | 2.04721789  | -3.4833005 |
| H    | 0.57729796  | 3.08811145  | -2.7648125 |
| O    | 1.35335401  | 0.52720476  | -4.4355227 |
| H    | 1.97478863  | 0.64943483  | -5.1532348 |
| H    | 1.80164132  | -0.0605538  | -3.8274025 |
| O    | -1.23099237 | -0.3240753  | -4.1978904 |
| H    | -0.32804989 | -0.0206358  | -4.2919711 |
| H    | -1.56712915 | -0.35854678 | -5.093466  |
| O    | -3.60483194 | -0.12054498 | -0.2176234 |
| H    | -3.19619191 | 0.35801927  | -0.9388872 |
| H    | -4.54249869 | -0.08479948 | -0.4066609 |
| O    | -2.90309098 | 0.98191417  | 2.1952174  |
| H    | -2.38054335 | 0.31999418  | 2.6480283  |
| H    | -3.12470842 | 0.57953186  | 1.3554519  |
| O    | -1.99962037 | 3.50760876  | 2.3890557  |
| H    | -2.32966532 | 2.61581529  | 2.2794812  |
| H    | -2.71029446 | 3.97416253  | 2.8289441  |
| O    | -0.74779473 | 4.51715691  | 0.1472741  |
| H    | 0.16156136  | 4.50223863  | 0.4457381  |
| H    | -1.24936731 | 4.17849736  | 0.8888714  |
| O    | -1.10313618 | 3.53111342  | -2.3305289 |
| H    | -0.98838065 | 3.8530084   | -1.4364111 |
| H    | -1.44789215 | 4.28213764  | -2.8135794 |
| O    | -2.56728421 | 1.20136497  | -2.330448  |
| H    | -2.10855524 | 0.66700474  | -2.9787217 |
| H    | -2.06978637 | 2.01846186  | -2.2975787 |



**Table S8.** Coordinates for lowest energy configuration of the (H<sub>2</sub>O)<sub>24</sub> cluster No. 5 calculated with the TIP4P potential

| Atom | X(Å)        | Y(Å)        | Z(Å)        |
|------|-------------|-------------|-------------|
| O    | 3.4712931   | 0.04462068  | -1.78762322 |
| H    | 4.32063162  | -0.14244542 | -2.18745092 |
| H    | 2.92228149  | -0.70091203 | -2.03052048 |
| O    | 1.98576928  | -2.05108663 | -2.6050266  |
| H    | 1.66347501  | -2.74597752 | -2.03101885 |
| H    | 1.25222083  | -1.86421947 | -3.19087571 |
| O    | 1.02979195  | -4.06946919 | -1.00496443 |
| H    | 1.34138807  | -4.95990641 | -1.16701763 |
| H    | 1.25785859  | -3.89796197 | -0.09128903 |
| O    | 1.64038     | -3.69186697 | 1.5883521   |
| H    | 2.17324023  | -2.95768797 | 1.89375841  |
| H    | 0.87164348  | -3.68403853 | 2.15862811  |
| O    | 3.02361483  | -1.54331271 | 2.63092843  |
| H    | 3.8844254   | -1.67351668 | 3.02877757  |
| H    | 3.15098782  | -0.82284516 | 2.01372955  |
| O    | 3.48986696  | 0.49410698  | 0.92400274  |
| H    | 3.46241114  | 0.33249754  | -0.01905633 |
| H    | 3.14424062  | 1.38091922  | 1.02568034  |
| O    | 2.1795447   | 2.08170816  | -3.09634456 |
| H    | 2.63594557  | 1.37836608  | -2.63456539 |
| H    | 1.99621572  | 2.73354541  | -2.41978671 |
| O    | -0.10557805 | 1.17919883  | -4.26190004 |
| H    | 0.71234643  | 1.53415763  | -3.91371097 |
| H    | -0.79115532 | 1.61630693  | -3.75677416 |
| O    | -0.07571948 | -1.49334751 | -4.34728868 |
| H    | -0.09400702 | -0.53699235 | -4.31148083 |
| H    | 0.23562698  | -1.69455042 | -5.22979229 |
| O    | -2.3408857  | -2.17711412 | -2.98327362 |
| H    | -1.54346373 | -1.95045514 | -3.46178774 |
| H    | -2.92046338 | -2.55181551 | -3.6465386  |
| O    | -1.71279416 | -3.9019432  | -0.93443402 |
| H    | -0.75806687 | -3.96253194 | -0.96694001 |
| H    | -1.93942132 | -3.3008953  | -1.64409125 |
| O    | -2.51605125 | -2.9514807  | 1.48536016  |
| H    | -2.28615669 | -3.32581015 | 0.63491452  |
| H    | -2.86535197 | -2.08441508 | 1.2794037   |
| O    | -0.55351684 | -3.47368694 | 3.24000032  |
| H    | -1.2571521  | -3.25278079 | 2.62981204  |
| H    | -0.90675872 | -4.19309444 | 3.76335953  |
| O    | 0.74538468  | -1.22048103 | 4.15451457  |
| H    | 1.56035523  | -1.28071685 | 3.65609056  |
| H    | 0.24509541  | -1.99271607 | 3.89070493  |
| O    | -0.56591276 | 1.12249366  | 4.33173395  |
| H    | -0.09527094 | 0.29481424  | 4.2333729   |
| H    | -0.74278788 | 1.18793598  | 5.27017113  |
| O    | 0.50106793  | 3.22129491  | 2.89797469  |
| H    | 0.21544453  | 2.48007045  | 3.43205092  |
| H    | -0.29913956 | 3.53718098  | 2.47831314  |
| O    | 2.64623864  | 3.09979188  | 1.28087375  |
| H    | 1.87620976  | 3.10800152  | 1.84939813  |
| H    | 3.34159309  | 3.48645286  | 1.813046    |
| O    | 1.66987662  | 3.93887635  | -1.13158487 |
| H    | 2.01786002  | 3.6346563   | -0.29337872 |
| H    | 2.10154521  | 4.78032078  | -1.27945422 |
| O    | -2.11755951 | 2.33795467  | -2.79028697 |
| H    | -2.82564731 | 2.70576961  | -3.31901722 |
| H    | -2.50311953 | 1.565557    | -2.37679312 |
| O    | -3.24363733 | 0.11993054  | -1.75698693 |
| H    | -2.93744709 | -0.69838093 | -2.1479418  |
| H    | -3.34897763 | -0.0828531  | -0.82746337 |
| O    | -3.61439251 | -0.49684418 | 0.8979868   |
| H    | -4.53377761 | -0.53245921 | 1.16198386  |
| H    | -3.22851712 | 0.17332355  | 1.4620854   |
| O    | -2.64651273 | 1.42131963  | 2.53358647  |
| H    | -1.95411682 | 1.24254337  | 3.16987162  |
| H    | -2.43403985 | 2.28692098  | 2.18455721  |
| O    | -1.85381442 | 3.91839411  | 1.65120466  |
| H    | -2.37167724 | 4.71322826  | 1.77883156  |
| H    | -1.60304157 | 3.94105566  | 0.72771602  |
| O    | -1.07362087 | 4.04878421  | -0.9159299  |
| H    | -0.12503719 | 3.99921533  | -1.03409828 |
| H    | -1.42867531 | 3.44604505  | -1.56928562 |

**Table S9.** Coordinates for lowest energy configuration of the (H<sub>2</sub>O)<sub>24</sub> cluster No. 6 calculated with the TIP4P potential

| Atom | X(Å)        | Y(Å)        | Z(Å)        |
|------|-------------|-------------|-------------|
| O    | -2.62952357 | 3.49454471  | -0.8483742  |
| H    | -2.93289081 | 2.61534268  | -0.6220913  |
| H    | -3.42862178 | 3.97701664  | -1.06025796 |
| O    | -0.65490008 | 4.5624207   | 0.75805878  |
| H    | -1.38924426 | 4.18384221  | 0.27468646  |
| H    | -0.02693409 | 4.81519808  | 0.08130613  |
| O    | 0.42389795  | 3.31405381  | 2.87971707  |
| H    | 0.02909634  | 3.72770269  | 2.11208556  |
| H    | 0.15227462  | 3.86365592  | 3.6148294   |
| O    | -0.94483925 | 0.96693595  | 3.37642378  |
| H    | -0.45669946 | 1.75771567  | 3.14703585  |
| H    | -0.27363786 | 0.2926815   | 3.48178729  |
| O    | -3.20738361 | 0.01651774  | 2.26320343  |
| H    | -2.39365292 | 0.36630189  | 2.62614315  |
| H    | -3.86216769 | 0.17831396  | 2.94240269  |
| O    | -3.56506146 | 1.04186614  | -0.25823584 |
| H    | -3.4425262  | 0.68593781  | 0.62183914  |
| H    | -3.37414353 | 0.30815351  | -0.84257133 |
| O    | -0.55098367 | 3.33670369  | -2.65750368 |
| H    | -1.3176216  | 3.34556691  | -2.08442465 |
| H    | 0.05761417  | 3.95544049  | -2.25376455 |
| O    | 1.12199531  | 5.05447167  | -1.29355814 |
| H    | 1.50869616  | 5.85679276  | -1.64423629 |
| H    | 1.87263032  | 4.51459152  | -1.04595294 |
| O    | 3.1874252   | 3.5172335   | -0.56344833 |
| H    | 3.13087687  | 3.18761412  | 0.33342691  |
| H    | 3.1921091   | 2.73036634  | -1.10847124 |
| O    | 2.93782859  | 2.64554197  | 2.03570646  |
| H    | 3.52130081  | 3.10846408  | 2.6369511   |
| H    | 2.0569699   | 2.87560717  | 2.33132415  |
| O    | 3.02683547  | -0.10355151 | 2.11757263  |
| H    | 3.03077494  | 0.85040276  | 2.03891144  |
| H    | 3.18314089  | -0.4184144  | 1.22725706  |
| O    | 0.9877282   | -0.96758111 | 3.64463566  |
| H    | 1.7038769   | -0.69916318 | 3.06903623  |
| H    | 1.41149901  | -1.16072148 | 4.48090531  |
| O    | -0.12581854 | -3.32350304 | 2.76315718  |
| H    | 0.25368429  | -2.49089499 | 3.04417903  |
| H    | -1.04358781 | -3.12015841 | 2.58265128  |
| O    | -2.6766406  | -2.66908437 | 2.06873892  |
| H    | -2.86589375 | -1.73263582 | 2.12772371  |
| H    | -2.86598755 | -2.89529889 | 1.15813112  |
| O    | -3.23882881 | -3.4019817  | -0.52594213 |
| H    | -2.44969469 | -3.89330368 | -0.75420052 |
| H    | -3.91603952 | -4.07042291 | -0.4220006  |
| O    | -3.12830259 | -1.07607383 | -1.95881582 |
| H    | -3.16098834 | -1.88263255 | -1.44439721 |
| H    | -3.85220906 | -1.15792172 | -2.57969599 |
| O    | 0.64780511  | 1.04491007  | -3.42665479 |
| H    | 0.18581227  | 1.82630387  | -3.1229803  |
| H    | 0.91181114  | 1.25513036  | -4.32238918 |
| O    | 3.00627615  | 1.23301476  | -2.02126801 |
| H    | 2.16848499  | 1.0999871   | -2.46471075 |
| H    | 3.13021063  | 0.44013151  | -1.49953222 |
| O    | 3.54106218  | -0.95970435 | -0.44445951 |
| H    | 4.46123555  | -1.18639763 | -0.57908107 |
| H    | 3.06381535  | -1.76510747 | -0.64394165 |
| O    | 2.31838346  | -3.29370973 | -1.02649401 |
| H    | 1.89273999  | -3.8181459  | -0.34824172 |
| H    | 1.74212487  | -3.3713404  | -1.78684351 |
| O    | 0.91036664  | -4.82376335 | 0.79467848  |
| H    | 1.23001869  | -5.6070212  | 1.24251946  |
| H    | 0.55885444  | -4.27367021 | 1.49472744  |
| O    | -1.03235587 | -4.79443332 | -1.15585051 |
| H    | -0.39558846 | -4.87612742 | -0.44586095 |
| H    | -0.53074867 | -4.43589363 | -1.88801944 |
| O    | 0.50611163  | -3.58650609 | -3.09192348 |
| H    | 0.05264728  | -2.75330177 | -3.21987852 |
| H    | 0.70022307  | -3.89261442 | -3.97784124 |
| O    | -0.81704208 | -1.27434873 | -3.44355139 |
| H    | -1.58945762 | -1.13629039 | -2.89533066 |
| H    | -0.33293372 | -0.45046698 | -3.38796553 |

**Table S10.** Coordinates for lowest energy configuration of the (H<sub>2</sub>O)<sub>24</sub> cluster No. 12 calculated with the TIP4P potential

| Atom | X(Å)        | Y(Å)        | Z(Å)        |
|------|-------------|-------------|-------------|
| O    | 3.73575223  | -0.00402335 | 2.30040352  |
| H    | 3.84050564  | 0.05689074  | 1.35090469  |
| H    | 4.62809824  | 0.04165994  | 2.643716    |
| O    | 2.11551566  | 2.04182267  | 3.1870911   |
| H    | 2.67769014  | 1.33029524  | 2.88062671  |
| H    | 1.92674829  | 2.55415512  | 2.40088873  |
| O    | 4.04332906  | 0.14165556  | -0.40956532 |
| H    | 4.84466924  | 0.13650741  | -0.933072   |
| H    | 3.57109726  | -0.64375658 | -0.68589253 |
| O    | 2.10972593  | -2.08191526 | 3.09996055  |
| H    | 2.68354683  | -1.372397   | 2.81091859  |
| H    | 1.91498355  | -2.57328373 | 2.30192278  |
| O    | 1.54217101  | 3.50317935  | 0.93602826  |
| H    | 0.58903528  | 3.43274166  | 0.88308807  |
| H    | 1.70713373  | 4.43761633  | 1.06191181  |
| O    | -0.17082668 | 1.31998741  | 4.47250414  |
| H    | 0.6537589   | 1.6048203   | 4.07859973  |
| H    | -0.08687459 | 0.36915062  | 4.54387133  |
| O    | 2.58756702  | 2.30634606  | -1.3013949  |
| H    | 3.06067306  | 1.54382726  | -0.96827692 |
| H    | 2.21750143  | 2.71893525  | -0.52097613 |
| O    | 2.78646488  | -2.10548079 | -1.16155418 |
| H    | 2.29826217  | -2.58691553 | -0.49363911 |
| H    | 2.261095    | -2.19816772 | -1.95630412 |
| O    | 1.47216759  | -3.48176654 | 0.82321509  |
| H    | 1.62003973  | -4.42686428 | 0.85721404  |
| H    | 0.51961733  | -3.38760888 | 0.82698246  |
| O    | 0.04016521  | -1.41938139 | 4.68097189  |
| H    | 0.77277863  | -1.65340655 | 4.11111082  |
| H    | 0.3513706   | -1.61544139 | 5.56468198  |
| O    | -1.14248034 | 3.38619302  | 0.85848833  |
| H    | -1.56077212 | 2.99176355  | 1.62379168  |
| H    | -1.63708086 | 3.04626894  | 0.11279819  |
| O    | -2.27440741 | 2.26702758  | 3.10089783  |
| H    | -1.52129678 | 1.93070779  | 3.58663975  |
| H    | -2.71239447 | 2.8562855   | 3.71504299  |
| O    | 1.25566188  | 2.33746422  | -3.64673295 |
| H    | 1.69611642  | 2.29626372  | -2.79789012 |
| H    | 1.65630449  | 3.08592376  | -4.08891577 |
| O    | 1.35569311  | -2.38486669 | -3.48776687 |
| H    | 1.35486705  | -1.55621518 | -3.96689924 |
| H    | 1.70901976  | -3.02119011 | -4.10944574 |
| O    | -1.2096201  | -3.30300973 | 0.95429701  |
| H    | -1.57272169 | -2.87029377 | 1.72704921  |
| H    | -1.7553793  | -2.99769234 | 0.22961775  |
| O    | -2.18097635 | -2.09194694 | 3.23159191  |
| H    | -2.70419701 | -2.63134887 | 3.82448105  |
| H    | -1.41300012 | -1.84479954 | 3.74672541  |
| O    | -2.6462252  | 2.45283116  | -1.24338925 |
| H    | -2.96381055 | 1.58999473  | -0.97714749 |
| H    | -3.43869582 | 2.98091668  | -1.3400735  |
| O    | -3.64828854 | 0.03734925  | 2.27177489  |
| H    | -3.18704033 | 0.82070552  | 2.57149955  |
| H    | -3.12559423 | -0.69155357 | 2.60602505  |
| O    | 1.13497052  | -0.11424956 | -4.91334501 |
| H    | 1.26654481  | 0.72742452  | -4.47687648 |
| H    | 0.19850849  | -0.13881275 | -5.10998515 |
| O    | -1.40035251 | -2.35695484 | -3.40287703 |
| H    | -0.44702882 | -2.43325638 | -3.36307948 |
| H    | -1.55769726 | -1.62019671 | -3.99335305 |
| O    | -2.80770285 | -2.44369965 | -1.10721398 |
| H    | -2.28608587 | -2.39910589 | -1.9085622  |
| H    | -3.55266132 | -2.99935181 | -1.33638508 |
| O    | -1.49963298 | 2.12340906  | -3.70962763 |
| H    | -0.5610968  | 2.27631465  | -3.60007602 |
| H    | -1.86509013 | 2.23551262  | -2.83207097 |
| O    | -3.65061844 | 0.09205533  | -0.44502573 |
| H    | -3.71622051 | 0.06012702  | 0.50938969  |
| H    | -3.33654416 | -0.77742311 | -0.69321201 |
| O    | -1.62013236 | -0.17727511 | -5.0895171  |
| H    | -1.66195765 | 0.63134677  | -4.57901428 |
| H    | -2.21296916 | -0.0271363  | -5.82588298 |

**Table S11.** Coordinates for lowest energy configuration of the (H<sub>2</sub>O)<sub>24</sub> cluster No. 22 calculated with the TIP4P potential

| Atom | X(Å)        | Y(Å)        | Z(Å)        |
|------|-------------|-------------|-------------|
| O    | 0.08612143  | -2.42043152 | -3.06344178 |
| H    | -0.76758051 | -2.00353512 | -2.94672744 |
| H    | 0.02135974  | -3.24089319 | -2.57468784 |
| O    | 2.54717153  | -1.36700614 | -2.92082388 |
| H    | 3.0310451   | -1.90403318 | -3.54827919 |
| H    | 1.65040145  | -1.69918383 | -2.96197291 |
| O    | -2.42757467 | -1.31276148 | -2.80840686 |
| H    | -2.44832672 | -0.35608489 | -2.8323045  |
| H    | -2.93553634 | -1.58300735 | -3.57337349 |
| O    | -0.04014153 | -4.66588578 | -1.53723581 |
| H    | -0.79739619 | -4.66182976 | -0.95176098 |
| H    | 0.71649706  | -4.66649533 | -0.95095131 |
| O    | 3.30086535  | -2.24612029 | -0.42098546 |
| H    | 3.03701184  | -1.8968565  | -1.27223628 |
| H    | 3.37279665  | -1.47580119 | 0.14263339  |
| O    | 2.42036113  | 1.35660849  | -2.79375133 |
| H    | 2.92635806  | 1.63880582  | -3.55569857 |
| H    | 2.44103249  | 0.40042361  | -2.83267452 |
| O    | -3.32467794 | -2.22029105 | -0.37211529 |
| H    | -3.01340263 | -1.88813099 | -1.21414214 |
| H    | -3.38825459 | -1.44352876 | 0.18360965  |
| O    | -2.55465619 | 1.41250644  | -2.89250467 |
| H    | -1.65798829 | 1.74530567  | -2.93075632 |
| H    | -3.04013171 | 1.95927914  | -3.51023031 |
| O    | -2.09157025 | -4.51573033 | 0.30336073  |
| H    | -2.52468734 | -3.68800198 | 0.09477692  |
| H    | -2.80479281 | -5.15127353 | 0.36361234  |
| O    | 2.02568005  | -4.51262775 | 0.28597884  |
| H    | 2.73213068  | -5.1534418  | 0.36670492  |
| H    | 2.4688324   | -3.69342591 | 0.06517081  |
| O    | 3.57722806  | -0.03789571 | 1.19373673  |
| H    | 2.91261721  | -0.04099309 | 1.88258698  |
| H    | 4.41069975  | -0.04588833 | 1.66436706  |
| O    | 3.32375348  | 2.22590872  | -0.34587059 |
| H    | 3.01030379  | 1.90696274  | -1.19218885 |
| H    | 3.38874171  | 1.44054503  | 0.19746379  |
| O    | -0.09396018 | 2.468085    | -3.02494713 |
| H    | 0.76003061  | 2.04942935  | -2.9169702  |
| H    | -0.02792349 | 3.28079738  | -2.52357943 |
| O    | -3.57414882 | 0.01913378  | 1.2033813   |
| H    | -4.40640452 | 0.019742    | 1.6762258   |
| H    | -2.90776459 | 0.01146172  | 1.89048031  |
| O    | -3.30189312 | 2.25237     | -0.37728022 |
| H    | -3.04023986 | 1.91647918  | -1.23457059 |
| H    | -3.37239187 | 1.47332097  | 0.17439394  |
| O    | -0.02570524 | -4.14950749 | 2.09483604  |
| H    | -0.78548656 | -4.28396183 | 1.52836785  |
| H    | 0.7283799   | -4.27877238 | 1.51961605  |
| O    | 1.8084472   | -0.04479522 | 3.23176917  |
| H    | 1.23949672  | -0.79684706 | 3.39591918  |
| H    | 1.25595752  | 0.71692212  | 3.40719344  |
| O    | 2.09243968  | 4.51047315  | 0.3686185   |
| H    | 2.52500039  | 3.68611864  | 0.14599165  |
| H    | 2.80582903  | 5.14500824  | 0.4369755   |
| O    | 0.03627918  | 4.68937804  | -1.4641118  |
| H    | 0.79503967  | 4.6761743   | -0.88072513 |
| H    | -0.71884638 | 4.68079366  | -0.87594214 |
| O    | -1.80011987 | -0.00583283 | 3.23670476  |
| H    | -1.24719604 | -0.77019161 | 3.3987626   |
| H    | -1.23073382 | 0.74356892  | 3.4111421   |
| O    | -2.0248418  | 4.50755517  | 0.36179567  |
| H    | -2.73106825 | 5.14701424  | 0.45435998  |
| H    | -2.4685788  | 3.69190224  | 0.12933144  |
| O    | -0.01694808 | -2.04690765 | 3.77316188  |
| H    | -0.02111815 | -2.76949611 | 3.14540368  |
| H    | -0.02131869 | -2.47342705 | 4.63007141  |
| O    | 0.02669735  | 1.98759672  | 3.8046833   |
| H    | 0.0332511   | 2.40065128  | 4.66815004  |
| H    | 0.02927534  | 2.71992276  | 3.18830373  |
| O    | 0.03118938  | 4.11620932  | 2.15945729  |
| H    | 0.7895119   | 4.25953039  | 1.59320835  |
| H    | -0.72437217 | 4.25444598  | 1.588275    |

**Table S12.** Coordinates for lowest energy configuration of the (H<sub>2</sub>O)<sub>24</sub> cluster No. 31 calculated with the TIP4P potential

| Atom | X(Å)        | Y(Å)        | Z(Å)        |
|------|-------------|-------------|-------------|
| O    | 1.4982977   | -4.05719759 | -1.62471492 |
| H    | 1.88080849  | -3.24746932 | -1.96273485 |
| H    | 1.95925152  | -4.75378502 | -2.09217547 |
| O    | 2.63819464  | -1.82930757 | -2.62003065 |
| H    | 2.15470527  | -1.24329623 | -3.20231974 |
| H    | 3.12374151  | -1.24355706 | -2.03919297 |
| O    | 1.29017632  | -4.03050338 | 1.12598433  |
| H    | 1.44282646  | -4.02978192 | 0.18103499  |
| H    | 0.35175336  | -4.19556245 | 1.21736095  |
| O    | -1.25923476 | -3.97814626 | -1.50393521 |
| H    | -0.30871331 | -3.99686205 | -1.61524797 |
| H    | -1.39472578 | -4.13915208 | -0.57015197 |
| O    | 1.33735105  | 0.01009327  | -4.21279142 |
| H    | 1.43843625  | 0.00102958  | -5.16459574 |
| H    | 0.39065758  | -0.00194357 | -4.07187153 |
| O    | 3.98625619  | 0.00298294  | -1.05815238 |
| H    | 3.70340386  | 0.02052619  | -0.14386652 |
| H    | 4.94189251  | -0.02811317 | -1.01316237 |
| O    | -1.4370699  | -4.41356381 | 1.21398902  |
| H    | -1.85513666 | -5.15612224 | 1.64994659  |
| H    | -1.75841085 | -3.64576176 | 1.68669595  |
| O    | 2.20646116  | -2.1298813  | 2.79892276  |
| H    | 1.88579364  | -2.77348463 | 2.16711668  |
| H    | 2.76269994  | -2.63350579 | 3.39322289  |
| O    | -2.73663355 | -2.05623184 | -2.67810878 |
| H    | -3.3758281  | -2.56998285 | -3.17179093 |
| H    | -2.18658367 | -2.7092573  | -2.2454025  |
| O    | -1.34102919 | -0.0221688  | -3.91511995 |
| H    | -1.77616471 | -0.77908836 | -3.52274043 |
| H    | -1.77964138 | 0.73480304  | -3.52673248 |
| O    | 2.63640104  | 1.8426068   | -2.60819921 |
| H    | 2.15370259  | 1.26075242  | -3.19529336 |
| H    | 3.13073076  | 1.25288946  | -2.03889839 |
| O    | 3.30680805  | 0.06194296  | 1.55386003  |
| H    | 2.91389276  | -0.70580462 | 1.96908656  |
| H    | 2.88443089  | 0.80777019  | 1.97997166  |
| O    | -2.28831896 | -2.29928224 | 2.63116487  |
| H    | -1.56690897 | -1.99473693 | 3.18166612  |
| H    | -2.67586204 | -1.49820703 | 2.27857347  |
| O    | -0.13645843 | -1.40121538 | 4.0346797   |
| H    | 0.67986018  | -1.65229482 | 3.60245884  |
| H    | -0.10901812 | -0.44481047 | 4.06240207  |
| O    | -3.59171005 | -0.01074171 | -1.02744392 |
| H    | -3.31399612 | -0.77080394 | -1.53872878 |
| H    | -3.31502474 | 0.74306512  | -1.54845481 |
| O    | -2.73352241 | 2.02175146  | -2.6938832  |
| H    | -2.18097758 | 2.67248455  | -2.26090226 |
| H    | -3.36178043 | 2.53812291  | -3.19874381 |
| O    | 1.50590781  | 4.06133263  | -1.58506252 |
| H    | 1.88717133  | 3.25349402  | -1.92896184 |
| H    | 1.94121978  | 4.75942812  | -2.07434569 |
| O    | 2.23864035  | 2.24536701  | 2.86669966  |
| H    | 3.00721358  | 2.67994153  | 3.23639142  |
| H    | 1.89107885  | 2.87163971  | 2.23170727  |
| O    | -3.47899614 | -0.00933097 | 1.67120625  |
| H    | -3.47056677 | -0.01054973 | 0.71404414  |
| H    | -4.40673893 | -0.05124651 | 1.90308604  |
| O    | -1.25139141 | 3.93322001  | -1.50567607 |
| H    | -0.29992363 | 3.96386388  | -1.60568529 |
| H    | -1.39961304 | 4.08519733  | -0.57231383 |
| O    | 1.25803626  | 4.07968537  | 1.16249457  |
| H    | 1.42899682  | 4.06486715  | 0.22080208  |
| H    | 0.31523765  | 4.22936265  | 1.23291716  |
| O    | -0.02088065 | 1.34393297  | 4.11450241  |
| H    | 0.04682653  | 1.69112344  | 5.00394401  |
| H    | 0.77514793  | 1.64658356  | 3.67749788  |
| O    | -2.18797847 | 2.20950491  | 2.65008488  |
| H    | -2.62557402 | 1.43417408  | 2.29851115  |
| H    | -1.46085131 | 1.86138385  | 3.16615625  |
| O    | -1.48356139 | 4.3650179   | 1.20828385  |
| H    | -2.00708559 | 5.07342266  | 1.58287288  |
| H    | -1.76013134 | 3.58340914  | 1.68664421  |

**Table S13.** Atomic coordinates in the unit cell for the lowest-energy configuration of clathrate structure. sL\_I. The unit cell size- and coordinate-optimization was performed using the AMOEBA potential.

| Atom | X(Å)      | Y(Å)      | Z(Å)      |
|------|-----------|-----------|-----------|
| O    | -0.887873 | -2.729329 | 1.169712  |
| H    | -1.481742 | -1.961664 | 1.169712  |
| H    | -1.481742 | -3.496994 | 1.169712  |
| O    | -2.729329 | -0.671743 | 1.169712  |
| H    | -2.729329 | -0.077875 | 0.402047  |
| H    | -2.729329 | -0.077875 | 1.937378  |
| O    | 3.227298  | -2.729329 | 1.169712  |
| H    | 3.821167  | -1.961664 | 1.169712  |
| H    | 3.821167  | -3.496994 | 1.169712  |
| O    | -2.729329 | 3.011168  | 1.169712  |
| H    | -2.729329 | 2.4173    | 0.402047  |
| H    | -2.729329 | 2.4173    | 1.937378  |
| O    | 1.169713  | -0.887873 | -2.729329 |
| H    | 1.169712  | -1.481742 | -1.961664 |
| H    | 1.169713  | -1.481742 | -3.496994 |
| O    | 3.011168  | 1.169712  | -2.729329 |
| H    | 2.4173    | 0.402047  | -2.729329 |
| H    | 2.4173    | 1.937378  | -2.729329 |
| O    | 1.169713  | 3.227298  | -2.729329 |
| H    | 1.169713  | 3.821167  | -1.961664 |
| H    | 1.169713  | 3.821167  | -3.496994 |
| O    | -0.671743 | 1.169712  | -2.729329 |
| H    | -0.077875 | 0.402047  | -2.729329 |
| H    | -0.077875 | 1.937378  | -2.729329 |
| O    | -2.729329 | 1.169712  | -0.887873 |
| H    | -1.961664 | 1.169712  | -1.481742 |
| H    | -3.496994 | 1.169712  | -1.481742 |
| O    | -2.729329 | 1.169712  | 3.227298  |
| H    | -3.496994 | 1.169712  | 3.821167  |
| H    | -1.961664 | 1.169713  | 3.821167  |
| O    | 1.169713  | -2.729329 | 3.011168  |
| H    | 0.402047  | -2.729329 | 2.4173    |
| H    | 1.937378  | -2.729329 | 2.4173    |
| O    | 1.169712  | -2.729329 | -0.671743 |
| H    | 0.402047  | -2.729329 | -0.077875 |
| H    | 1.937378  | -2.729329 | -0.077875 |
